# Supplementary material for: Variability of Creatine Metabolism Genes in Children with Autism Spectrum Disorder
Source: Int J Mol Sci. 2017 Jul 31;18(8):1665. doi: 10.3390/ijms18081665 (PMC5578055; doi:10.3390/ijms18081665)
Supplement: Supplementary file 1 [file ijms-18-01665-s001.zip]

Archive with 6 entries (6 files):
- Supplementary Tables legends.pdf
- Supp Table 1 Summary of GATM gene sequencing results divided by population.xlsx
- Supp Table 2 Summary of GAMT gene sequencing results divided by population.xlsx
- Supp Table 3 Summary of SLC6A8 gene seq results divided by population.xlsx
- Supp Table 4 Primer sequences.xlsx
- Supp Table 5 Gender and Ethnicity.xlsx
