# Supplementary material for: Variability of Creatine Metabolism Genes in Children with Autism Spectrum Disorder
Source: Int J Mol Sci. 2017 Jul 31;18(8):1665. doi: 10.3390/ijms18081665 (PMC5578055; doi:10.3390/ijms18081665)
Supplement: Supplementary file 1 [file ijms-18-01665-s001.zip › Supp Table 1 Summary of GATM gene sequencing results divided by population.xlsx]

## Sheet: AGAT
GATM (AGAT)			Autism pop (n=332)1												1000genomes Phase 3 (n=5008)
DNA change/ protein change	SNP ID	EUR n=208			ASN n=34			AFN n=4			MIX/UNK n=86				EUR n=1006			East ASN n=1008			AFN n=1322			ALL n=5008			Fisher Exact test EUR	Fisher Exact test ASN	Fisher Exact test AFR	Fisher Exact test ALL	Notes
		Minor2	Major3	MAF4	Minor	Major	MAF	Minor	Major	MAF	Minor	Major	MAF		Minor	Major	MAF	Minor	Major	MAF	Minor	Major	MAF	Minor	Major	MAF
c.-200C>T	rs7164139	62	146	0.298077	15	19	0.441176	3	1	0.75	38	48	0.44186		277	729	0.275348	811	197	0.804563	422	900	0.319213	2223	2785	0.44389	0.498	5e-06	0.0997	1
c.-140C>T	rs533626184	0	208	0	0	34	0	0	4	0	1	85	0.0116279		0	1006	0	0	1008	0	11	1311	0.00832073	11	4997	0.00219649	1	1	1	0.185
c.-30T>G	rs8024550	0	208	0	1	33	0.0294118	0	4	0	4	82	0.0465116		0	1006	0	8	1000	0.00793651	624	698	0.472012	720	4288	0.14377	1	0.259	0.127	0.0074
c.70-77C>T	rs12437887	59	149	0.283654	16	18	0.470588	3	1	0.75	38	48	0.44186		277	729	0.275348	813	195	0.806548	419	903	0.316944	2221	2787	0.44349	0.799	2e-05	0.0978	1
c.70-38G>T	rs12437840	61	147	0.293269	16	18	0.470588	3	1	0.75	39	47	0.453488		227	729	0.225646	813	195	0.806548	417	905	0.315431	2219	2789	0.443091	0.0928	2e-05	0.0966	0.9129
c.282G>A, p.=	rs141223762	1	207	0.00480769	0	34	0	0	4	0	0	86	0		13/ 73336*	73323/ 73336	0.000177266	0/ 25166	25166/ 25116	0	1/ 10406	10405/ 10406	9.60984e-05	14/ 121390	121376/ 121390	0.000115331	0.0389	1	1	1
c.289-76T>C	rs540536879	2	206	0.00961538	0	34	0	0	4	0	1	85	0.0116279		1	1005	0.000994036	0	1008	0	0	1322	0	5	5003	0.000998403	0.078	1	1	0.0971
c.289-34T>C	rs74009633	0	208	0	0	34	0	0	4	0	1	85	0.0116279		0	1006	0	0	1008	0	48	1274	0.0363086	48	4960	0.00958466	1	1	1	0.568
c.289-24G>A	rs145644806	0	208	0	0	34	0	0	4	0	1	85	0.0116279		0	1006	0	0	1008	0	1	1321	0.00075643	1	5007	0.000199681	1	1	1	0.0335
c.330A>T, p.Q110H	rs1288775	63	145	0.302885	17	17	0.5	4	0	1	48	38	0.55814		280	726	0.27833	825	183	0.818452	1147	175	0.867625	3098	1910	0.61861	0.4987	3.7e-05	1	0.2642
c.485-11_dupT		1	207	0.00480769	0	34	0	0	4	0	0	86	0		1/ 70262*	70261/ 70262	1.42326e-05	0/ 23780	23780/ 23780	0	0/ 9816	9816/ 9816	0	1/ 115568	115567/ 115568	8.65351e-05	0.0059	1	1	1
c.700G>C, p.D234H		0	208	0	0	34	0	0	4	0	1	85	0.0116279		0/ 6606*	6606/ 6606	0	2/ 16494	16492/ 16494	0.000121256	0/ 10394	10394/ 10394	0	2/121120	121118/ 121120	1.65125e-05	1	1	1	0.002127
c.813+46C>G	rs150282769	1	207	0.00480769	0	34	0	0	4	0	0	86	0		1	1005	0.000994036	0	1008	0	0	1322	0	1	5007	0.000199681	0.313	1	1	1
c.978+43T>C		0	208	0	0	34	0	0	4	0	1	85	0.0116279																		Novel
c.979-316A>G	rs9972405	23	185	0.110577	5	29	0.147059	0	4	0	12	74	0.139535		132	874	0.131213	81	927	0.0803571	73	1249	0.0552194	500	4508	0.0998403	0.493	0.193	1	0.208
c.979-49_979-51delTAA	rs200176845	0	208	0	0	34	0	0	4	0	1	85	0.0116279		0	1006	0	0	1008	0	49	1273	0.0370651	50	4958	0.00998403	1	1	1	0.582
c.979-39T>C		0	208	0	1	33	0.0294118	0	4	0	0	86	0																		Novel
c.1043-254A>G	rs57369693	23	185	0.110577	5	29	0.147059	0	4	0	12	74	0.139535		132	874	0.131213	81	927	0.0803571	73	1249	0.0552194	500	4508	0.0998403	0.493	0.193	1	0.208
c.1159+39A>G	rs113129788	0	208	0	0	34	0	0	4	0	1	85	0.0116279		0	1006	0	0	1008	0	1	1321	0.00075643	1	5007	0.000199681	1	1	1	0.0335
c.1160-46C>T	rs201589362	2	206	0.00961538	0	34	0	0	4	0	0	86	0		1	1005	0.000994036	0	1008	0	0	1322	0	1	5007	0.000199681	0.078	1	1	1
c.1252T>C, p.=	rs1145086	85	123	0.408654	22	12	0.647059	4	0	1	61	25	0.709302		410	596	0.407555	906	102	0.89881	1218	104	0.921331	3594	1414	0.717652	1	0.000114	1	0.904
c.*27C>G	rs200143728	0	208	0	0	34	0	0	4	0	1	85	0.0116279		51/ 71808*	71757/ 71808	0.000710227	0/ 24622	24622/ 24622	0	1/ 10148	10147/ 10148	9.85513e-05	56/ 118754	118698/ 118754	0.000471563	1	1	1	0.0404
c.*125G>A	rs143689218	0	208	0	0	34	0	1	3	0.25	1	85	0.0116279		2	1004	0.00198807	0	1008	0	36	1286	0.0272315	43	4965	0.00858626	1	1	0.107	0.529
c.*411G>A		0	208	0	0	34	0	0	4	0	1	85	0.0116279																		Novel
c.*600A>G	rs1049503	58	150	0.278846	18	16	0.529412	3	1	0.75	41	45	0.476744		276	730	0.274354	813	195	0.806548	422	900	0.319213	2257	2751	0.450679	0.932	0.0003	0.0997	0.663
c.*715T>C	rs1049508	56	152	0.269231	17	17	0.5	4	0	1	46	40	0.534884		278	728	0.276342	825	183	0.818452	1145	177	0.866112	3094	1914	0.617812	0.865	3.7e-05	1	0.119
c.*734_*735insCA	rs35410548	83	125	0.399038	23	11	0.676471	4	0	1	61	25	0.709302		410	596	0.407555	906	102	0.89881	1218	104	0.921331	3594	1414	0.717652	0.877	0.000499	1	0.904
c.*913G>A	rs17618637	7	201	0.0336538	0	34	0	0	4	0	3	83	0.0348837		122	884	0.121272	0	1008	0	5	1317	0.00378215	277	4731	0.0553115	5e-05	1	1	0.6299
c.*940C>T	rs1049518	38	170	0.182692	18	16	0.529412	4	0	1	48	38	0.55814		410	596	0.407555	906	102	0.89881	1218	104	0.921331	3594	1414	0.717652	0	0	1	0.002348
Table Legend
1Total number of samples = 166 (n=332 alleles)
2Number of minor alleles seen in population
3Number of major alleles seen in population
4Minor allele frequency; the number of alleles in which variant was found/ total number of alleles
*Compared to ExAC database
Supplementary Table 2. Summary of GATM gene (AGAT) sequencing results divided by population. Variants identified in the ASD population are noted, and Minor Allele Frequency calculated (MAF). MAF of variants present in 1000 Genomes, are shown. 1Total number of samples = 166 (n=332 alleles); 2Number of minor alleles seen in population; 3Number of major alleles seen in population; 4Minor allele freq…
