# Supplementary material for: Variability of Creatine Metabolism Genes in Children with Autism Spectrum Disorder
Source: Int J Mol Sci. 2017 Jul 31;18(8):1665. doi: 10.3390/ijms18081665 (PMC5578055; doi:10.3390/ijms18081665)
Supplement: Supplementary file 1 [file ijms-18-01665-s001.zip › Supp Table 2 Summary of GAMT gene sequencing results divided by population.xlsx]

## Sheet: Sheet1
GAMT		Autism pop (n=332)1													1000genomes Phase 3
DNA change/ protein change	SNP ID	EUR n=208			ASN n=34			AFN n=4			MIX/UNK n=86				EUR n=1006			East ASN n=1008			AFN n=1322			ALL n=5008			Fisher Exact test EUR	Fisher Exact test ASN	Fisher Exact test AFR	Fisher Exact test ALL	Notes
		Minor2	Major3	MAF4	Minor	Major	MAF	Minor	Major	MAF	Minor	Major	MAF		Minor	Major	MAF	Minor	Major	MAF	Minor	Major	MAF	Minor	Major	MAF
c.182-173G>A	rs112975707	0	208	0	0	24	0	1	3	0.25	5	81	0.0581395		2	1004	0.00198807	0	1008	0	233	1089	0.176248	246	4762	0.0491214	1	1	0.54	0.615
c.227C>T, p.S76L	rs150338273	2	206	0.00961538	0	24	0	0	4	0	0	86	0		29/ 40826*	40797/ 40826	0.000710506	0/ 16492	16492/ 16492	0	0/ 6322	6322/ 6322	0	29/ 70554	70525/ 70554	0.000411033	0.011	1	1	1	Exac
c.327+69T>G	rs266808	0	208	0	0	24	0	1	3	0.25	3	83	0.0348837		0	1006	0	0	1008	0	222	1100	0.167927	226	4782	0.0451278	1	1	0.522	1
c.348G>A, p.=	rs117884619	0	208	0	1	23	0.0294118	0	4	0	0	86	0		0	1006	0	50	958	0.0496032	0	1322	0	52	4956	0.0103834	1	1	1	1
c.391+47A>G	rs73515058	5	203	0.0240385	2	22	0.0588235	1	3	0.25	4	82	0.0465116		53	953	0.0526839	16	992	0.015873	221	1101	0.167171	433	4575	0.0864617	0.105	0.063	0.5199	0.243
c.460-31G>A	rs55776826	28	180	0.134615	3	21	0.0882353	1	3	0.25	13	73	0.151163		129	877	0.128231	11	997	0.0109127	221	1101	0.167171	567	4441	0.113219	0.82	0.0034	0.5199	0.301
c.571-60C>T	rs266809	1	207	0.00480769	0	24	0	3	1	0.75	4	82	0.0465116		18	988	0.0178926	0	1008	0	311	1011	0.23525	366	4642	0.0730831	0.227	1	0.043	0.526
c.571-6G>A	rs2074899	6	202	0.0288462	4	20	0.117647	0	4	0	12	74	0.139535		19	987	0.0188867	285	723	0.282738	21	1301	0.015885	545	4463	0.108826	0.417	0.256	1	0.381
c.626C>T, p.T209M	rs17851582	17	191	0.0817308	1	23	0.0294118	0	4	0	5	81	0.0581395		83	923	0.082505	0	1008	0	4	1318	0.00302572	183	4825	0.0365415	1	0.023	1	0.249
c.*146A>G	rs659455	1	207	0.00480769	0	24	0	3	1	0.75	3	83	0.0348837		18	988	0.0178926	0	1008	0	325	997	0.24584	383	4625	0.0764776	0.227	1	0.049	0.213
c.*151T>C	rs659460	1	207	0.00480769	0	24	0	3	1	0.75	3	83	0.0348837		18	988	0.0178926	0	1008	0	323	999	0.244327	381	4627	0.0760783	0.227	1	0.048	0.213
c.*276C>T	rs266810	1	207	0.00480769	0	24	0	3	1	0.75	3	83	0.0348837		18	988	0.0178926	0	1008	0	323	999	0.244327	381	4627	0.0760783	0.227	1	0.048	0.213
c.*311C>G	rs266811	1	207	0.00480769	0	24	0	3	1	0.75	3	83	0.0348837		18	988	0.0178926	0	1008	0	323	999	0.244327	381	4627	0.0760783	0.227	1	0.048	0.213
c.*369C>A	rs75762821	1	207	0.00480769	0	24	0	0	4	0	2	84	0.0232558		12	994	0.0119284	0	1008	0	2	1320	0.00151286	28	4980	0.00559105	0.227	1	1	0.09
c.*388C>T	rs266812	1	207	0.00480769	0	24	0	3	1	0.75	3	83	0.0348837		18	988	0.0178926	0	1008	0	322	1000	0.24357	379	4629	0.0756789	0.227	1	0.048	0.212
c.*406A>G	rs266813	2	206	0.00961538	3	21	0.0882353	4	0	1	10	76	0.116279		39	967	0.0387674	286	722	0.28373	769	553	0.581694	1372	3636	0.273962	0.0333	0.108	0.145	0.00057
Table Legend
1Total number of samples = 166 (n=332 alleles)
2Number of minor alleles seen in population
3Number of major alleles seen in population
4Minor allele frequency; the number of alleles in which variant was found/ total number of alleles
Supplementary table 3. Summary of GAMT gene sequencing results divided by population. Variants identified in the ASD population are noted, and Minor Allele Frequency calculated (MAF). MAF of variants present in 1000 Genomes, are shown. 1Total number of samples = 166 (n=332 alleles); 2Number of minor alleles seen in population; 3Number of major alleles seen in population; 4Minor allele frequency; …
