# Supplementary material for: Variability of Creatine Metabolism Genes in Children with Autism Spectrum Disorder
Source: Int J Mol Sci. 2017 Jul 31;18(8):1665. doi: 10.3390/ijms18081665 (PMC5578055; doi:10.3390/ijms18081665)
Supplement: Supplementary file 1 [file ijms-18-01665-s001.zip › Supp Table 3 Summary of SLC6A8 gene seq results divided by population.xlsx]

## Sheet: Sheet1
SLC6A8		Autism pop (n=198)1													1000genomes Phase 3
DNA change/ protein change	SNP ID	EUR n=126			ASN n=20			AFN n=2			MIX/UNK n=50				EUR n=766			East ASN n=764			AFN n=1003			ALL n=3775			Fisher Exact test EUR	Fisher Exact test ASN	Fisher Exact test AFR	Fisher Exact test ALL	Notes
		Minor2	Major3	MAF4	Minor	Major	MAF	Minor	Major	MAF	Minor	Major	MAF		Minor	Major	MAF	Minor	Major	MAF	Minor	Major	MAF	Minor	Major	MAF
c.-5A>G	rs384573	126	0	1	20	0	1	2	0	1	50	0	1		1830/ 1830*	0/ 1830	1	4059/ 4059	0/ 4059	1	159/ 159	0/ 159	1	6172/ 6172	0/ 6172	1	1	1	1	1	Exac
c.262+26T>C	rs192387453	17	109	0.134921	4	16	0.2	0	2	0	10	40	0.2		83	683	0.108355	72	692	0.0942408	241	762	0.240279	570	3205	0.150993	0.363	0.12	1	0.322
c.263-95G>A		1	125	0.00793651	0	20	0	0	2	0	0	50	0																		Novel
c.394+88G>A	rs6643763	17	109	0.134921	3	17	0.15	0	2	0	8	42	0.16		86	680	0.112272	72	692	0.0942408	66	937	0.0658026	385	3390	0.101987	0.453	0.428	1	0.164
c.394+108G>A		0	126	0	1	19	0.05	0	2	0	0	50	0																		Novel
c.813C>T, p.=	rs138064933	1	125	0.00793651	0	20	0	0	2	0	0	50	0		1	765	0.00130548	0	764	0	0	1003	0	2	3773	0.000529801	0.262	1	1	1
c.913-40T>C	rs187505163	0	126	0	0	20	0	0	2	0	1	49	0.02		0	766	0	0	764	0	35	968	0.0348953	34	3741	0.00900662	1	1	1	0.37
c.1016+41dupTGCCC	rs371888321	0	126	0	0	20	0	0	2	0	1	49	0.02																		Novel
c.1016+56delTGCCC		1	125	0.00793651	0	20	0	0	2	0	0	50	0																		Novel
c.1141+18G>A	rs187400676	0	126	0	0	20	0	0	2	0	1	49	0.02		0	766	0	5	759	0.0065445	0	1003	0	22	3753	0.00582781	1	1	1	0.262
c.1141+37G>A	rs2071028	11	115	0.0873016	2	18	0.1	1	1	0.5	10	40	0.2		71	695	0.0926893	92	672	0.120419	208	795	0.207378	576	3199	0.152583	1	1	0.373	0.327
c.1141+87A>G	rs41302172	19	107	0.150794	3	17	0.15	0	2	0	10	40	0.2		84	682	0.109661	74	690	0.0968586	65	938	0.0648056	383	3392	0.101457	0.178	0.436	1	0.032
c.1142-130C>T	rs141015652	0	126	0	0	20	0	0	2	0	3	47	0.06		0	766	0	27	737	0.0353403	51	952	0.0508475	81	3694	0.021457	1	1	1	0.096
c.1142-69G>A		0	126	0	1	19	0.05	0	2	0	0	50	0																		Novel
c.1142-35G>A	rs201555047	1	125	0.00793651	0	20	0	0	2	0	1	49	0.02		4	762	0.00522193	1	763	0.0013089	0	1003	0	21	3754	0.00556291	0.534	1	1	0.26
c.1162G>A, p.A388T	rs374163604	1	125	0.00793651	0	20	0	0	2	0	0	50	0		1	765	0.00130548	0	764	0	0	1003	0	1	3774	0.000264901	0.263	1	1	1
c.1255-44delG	rs34035058	1	125	0.00793651	0	20	0	0	2	0	0	50	0		17/ 35815*	35798/ 35815	0.000474661	0/ 12718	12718/ 12718	0	1/ 6461	6460/ 6461	0.000154775	18/ 62628	62610/ 62628	0.000287411	0.061	1	1	1	Exac
c.1255-31C>T	rs193175235	0	126	0	0	20	0	0	2	0	2	48	0.04		0	766	0	27	737	0.0353403	14	989	0.0139581	42	3733	0.0111258	1	1	1	0.112
c.1392+31T>C	rs183780161	0	126	0	0	20	0	0	2	0	1	49	0.02		0	766	0	0	764	0	9	994	0.00897308	10	3765	0.00264901	1	1	1	0.135
c.1495+38C>T	rs200729826	0	126	0	2	18	0.1	0	2	0	0	50	0		0	766	0	0	764	0	0	1003	0	78	3697	0.0206623	1	0.000619	1	0.626
c.1496-17G>A	rs375265267	0	126	0	0	20	0	0	2	0	1	49	0.02		3/ 51667*	51664/ 51667	5.80641e-05	0/ 16680	16680/ 16680	0	0/ 8356	8356/ 8356	0	3/ 86591	86588/ 86591	3.46456e-05	1	1	1	0.002306	Exac
c.1496-8C>T	rs376038235	0	126	0	0	20	0	0	2	0	2	48	0.04		0	766	0	9	755	0.0117801	0	1003	0	9	3766	0.00238411	1	1	1	0.008544
c.1596+21G>A	rs73633747	0	126	0	0	20	0	0	2	0	1	49	0.02		0	766	0	0	764	0	69	934	0.0687936	70	3705	0.018543	1	1	1	0.611
c.1768-3C>T	rs150207268	1	125	0.00793651	0	20	0	0	2	0	0	50	0		4	762	0.00522193	0	764	0	1	1002	0.000997009	9	3766	0.00238411	0.534	1	1	1
c.*207G>C	rs6571290	15	111	0.119048	3	17	0.15	1	1	0.5	9	41	0.18		88	678	0.114883	71	693	0.0929319	416	587	0.414756	731	3044	0.193642	0.881	0.425	1	1
Table Legend
1Total number of samples = 166 (32 females, 134 males; n=198 alleles)
2Number of minor alleles seen in population
3Number of major alleles seen in population
4Minor allele frequency; the number of alleles in which variant was found/ total number of alleles
Supplementary table 4. Summary of SLC6A8 gene sequencing results divided by population. Variants identified in the ASD population are noted, and Minor Allele Frequency calculated (MAF). MAF of variants present in 1000 Genomes, are shown. Total number of samples = 166 (32 females, 134 males; n=198 alleles); 2Number of minor alleles seen in population; 3Number of major alleles seen in population; 4…
