# Supplementary material for: Variability of Creatine Metabolism Genes in Children with Autism Spectrum Disorder
Source: Int J Mol Sci. 2017 Jul 31;18(8):1665. doi: 10.3390/ijms18081665 (PMC5578055; doi:10.3390/ijms18081665)
Supplement: Supplementary file 1 [file ijms-18-01665-s001.zip › Supp Table 4 Primer sequences.xlsx]

## Sheet: Sheet1
Gene	gDNA region amplified	Primer name	Forward primer (5´-3´)	Reverse primer (5´-3´)	Product size (bp)
GATM (AGAT)	5´UTR - exon 1	GATM-5UTR-EX1-F new/ GATM-5UTR-EX1-R	CGAAAAATGAGGTGACTGGTTC	CTAGGGAAAGCGAGGGAAGG	682
“	exon 2	GATM-EX2-F/ GATM-EX2-R	TCCCACTACCCACCTACACAC	GCTGAAGGGAAAGCAGTCAG	463
“	exon 3	GATM-EX3-F/ GATM-EX3-R new	CAGCACTGAACATGGAGTGG	CACGAGATGGAATGGAGTTTAG	529
“	exon 4	GATM-EX4-F new/ GATM-EX4-R	CTTTTAGTAGAGATGGGGCTTG	GGATCATTTACTCTTATCATATTCATC	554
“	exon 5-6	GATM-EX5-6-F/ GATM-EX5-6-R	ATTTATCATGGACCCGCTTC	GCCATAAGGAATCCAATGTTTG	782
“	exon 7	GATM-EX7-F new1/ GATM-EX7-R new	GGACTGTGGGTTTGATGTAG	TCCCAGCCTTGTTCTGATG	604
“	exon 8	GATM-EX8-F new/ GATM-EX8-R	GGGCAATAGTCTCAAACTCC	TGACTTTCTGTGAAATAATAACTTGG	573
“	exon 9-3´UTR	GATM-EX9-3UTR-F new1/ GATM-EX9-3UTR-R	CTCTGTTGACTTTTTGGAGAAG	GAGACAATTACCTGGTTCTACTTAGG	840
“	3´UTR	GATM-3UTR-F/ GATM-3UTR-R new	AAGGCAGCTTGAAATGTTGG	GGAGTTCAAGGCGTTAGTAAG	994
GAMT	5´UTR - exon 1	GAMT-Promoter-exon1-F/ GAMT-Promoter-exon1-R	TCCAACAGCGCCTGGAAGATCCTCAGATTC	TGCCGCACTCCCCGTGAACGCCTCCGTGTG	750
	5´UTR	GAMT-Promoter-Fnested/ GAMT-Promoter-Rnested	TCCAACAGCGCCTGGAAGATCCTCA	GGTGCGTGTCCGCTGCGTCGTAGG	496
	exon 1	GAMT-exon 1-Fnested/ GAMT-Promoter-Rnested	GGCGGCGCGCGATCGAGGTCGGGTCGCCGT	CGGGGCAGCCCCGGCCTCAGTTTCCCCTGC	288
“	exon 2	GAMT-exon 2a-F/ GAMT-exon 2a-R	TCCAGGCAGCCTCCCCAGCATTGCCCCACA	CAGAGGGGAAAAGAAAAAGAGAGGACAGGG	562
“	exon 2	GAMT-exon 2a –Fnested/ GAMT-exon 2a -Rnested	CCCCCTCCAGGCAGACCCCC	CGCCCGCCGCGCCCCGCGCCCGTCCCGCCGCCCCCGCCCGCCAGTCCCGGAGCCGCTGGA	309
“	exon 2	GAMT-exon 2b –Fnested/ GAMT-exon 2b -Rnested	CGCCCGCCGCGCCCCGCGCCCGTCCCGCCGCCCCCGCCCGAGCGTCAAAGGTGCAGGAGG	GCCCCCAACCCCCAGGAAGC	221
“	exon 3	GAMT-exon 3-F/ GAMT-exon 3-R	GGCCTGGGGCTGTCAGAGGTGGAGGAGGTG	CACAGCCAGGCCCACACCCACTTGGGCTCT	325
“	exon 3	GAMT-exons 3 –Fnested/ GAMT-exons 3 -Rnested	CGCCCGCCGCGCCCCGCGCCCGTCCCGCCGCCCCCGCCCGAGGTGGTCTTCTCTCTCGGG	CCCCCACAAGCAAAGGAGGG	285
“	exon 4-5	GAMT-exons 4-5-F/ GAMT-exons 4-5-R	GGCGATCTCGGGGTTCTCAAGCCTGTGTGG	AGCAAGGTGGCTCCAGCAGCCCCTTCCCAC	516
“	exon 4	GAMT-exon 4 –Fnested/ GAMT-exon4-Rnested	CGCCCGCCGCGCCCCGCGCCCGTCCCGCCGCCCCCGCCCGCTGACCGCGTGGGCTTCTGT	TGGCCAGTGGTCAGGACGGA	226
“	exon 5	GAMT-exons 5 –Fnested/ GAMT-exons 5 -Rnested	GGCCCTCGGGGAAGCCCCTC	CGCCCGCCGCGCCCCGCGCCCGTCCCGCCGCCCCCGCCCGGCCCCTTCCCACCCCCATCC	286
“	exon 6	GAMT-exon 6-F/ GAMT-exon 6-R	GGGAGCTGGAGATTCCCGTTCACACCTGGG	CCTCACAGAGAAGCTGGGAAAGCTGCTGGT	519
“	exon 6	GAMT-exon 6-Fnested/ GAMT-exon 6-Rnested	GCACGTGACCCCCATGGCCC	CGCCCGCCGCGCCCCGCGCCCGTCCCGCCGCCCCCGCCCGAGGAAGGCACGGAGGAGGGC	280
“	3´UTR	GAMT-3UTR-F/ GAMT-3UTR-R	CTGCCGCTACTACGCCTTCCCACAGATGAT	GCCACCCCCTGAGACCCTGACCTAGTTACC	571
“	3´UTR	GAMT-3UTR-Fnested/ GAMT-3UTR-Rnested	CTTCCCACAGATGATCACGC	TTTACTTCACCTCAGGGACC	278
SLC6A8	exon 1	SLC6A8-ex1M13-F/ SLC6A8-ex1M13-R	GTAAAACGACGGCCAGACCGCCGCCCCCCGTGAG	CAGGAAACAGCTATGACCGGGGGCCACCCGTTGCCCGGACTTCA	461
“	exon 2	SLC6A8-ex2-F/ SLC6A8-ex2-R	CACCCCCTCAAGACTCCAC	CTGCCTATGCCCCCTCTAGT	489
“	exon 3	SLC6A8-ex3-F1/ SLC6A8-ex3-R2	AAGGCTCCAGGAGGACAGAT	GCAACATGAGGGAGACCTGGG	423
“	exon 3	SLC6A8-ex3-FM13/ SLC6A8-ex3-RM13	GTAAAACGACGGCCAAAGGCTCCAGGAGGACAGAT	CAGGAAACAGCTATGAGCAACATGAGGGAGACCTGGG	454
“	exon 4	SLC6A8-ex4-F/ SLC6A8-ex4-R	CAGCCCAATTGGACAAGAG	AGCATTGCTTGGCTTTCAGT	409
“	exon 5-7	SLC6A8-ex5-Fnew/ SLC6A8-ex7-R	TGGGGACCTCTGAACATACC	GGCCCACAATCTGACAAGTT	780
“	exon 8-10	SLC6A8-ex8-FM13/ SLC6A8-ex10-RnewM13	GTAAAACGACGGCCAGGTCCTGGGATTTGTCAATG	CAGGAAACAGCTATGAGGCAATGTCGTCCATGAAG	868
“	exon 11-12	SLC6A8-ex11M13-F/ SLC6A8-ex12M13-R	GTAAAACGACGGCCAGAAGGCAGGTCTCCAGCTTGG	CAGGAAACAGCTATGAAGGCTGGGTTGAATGTTCAC	491
“	exon 13	SLC6A8-ex13M13-F/ SLC6A8-ex13M13-R	GTAAAACGACGGCCAGGGCAGGCAGTGGGAACCGG	CAGGAAACAGCTATGATAGGACCAGCTCGGCTAGGG	511
Supplementary Table 1. Primers used for amplification of GATM, GAMT and SLC6A8 gDNA for sequencing. The GC clamp added to some primers is underlined and M13 clamps are in bold.
