# Supplementary material for: Variability of Creatine Metabolism Genes in Children with Autism Spectrum Disorder
Source: Int J Mol Sci. 2017 Jul 31;18(8):1665. doi: 10.3390/ijms18081665 (PMC5578055; doi:10.3390/ijms18081665)
Supplement: Supplementary file 1 [file ijms-18-01665-s001.zip › Supp Table 5 Gender and Ethnicity.xlsx]

## Sheet: Sheet1
		Population
		EUR	ASN	AFR	UNK
Female	30	21	3	0	0
Male	135	83	14	2	0
Unknown	1	0	0	0	1
Total	166	104	17	2	43
